# Supplementary material for: Cryptic Diversity of the European Blind Mole Rat Nannospalax leucodon Species Complex: Implications for Conservation
Source: MDPI journal article supplement (doi:10.3390/ani12091097), 2022-04-23
Supplement: s1 [file s1]

**Table S1.** A list of 16S *rRNA* sequences imported from GenBank. See Figure 1 for abbreviations of *N. leucodon* chromosomal forms and their sampling localities (letters in parentheses).

| GenBank ID | Sampling Locality*    | Species/Chromosomal Form       | 2n/NF | Reference          |
|------------|-----------------------|--------------------------------|-------|--------------------|
| HQ652170   | Mezőtúr, HU           | <i>N. leucodon/ hun</i> (d)    | 48/84 | Hadid et al. 2012  |
| HQ652165   | Šušara, RS            | <i>N. leucodon/ hun</i> (d)    | 48/84 | Hadid et al. 2012  |
| HQ652155   | Józsa, HU             | <i>N. leucodon/ tra</i> (e)    | 50/84 | Hadid et al. 2012  |
| HQ652173   | isolate 915           | <i>N. leucodon/ tra</i> (e)    | 50/84 | Hadid et al., 2012 |
| HQ652171   | Subotička Peščara, RS | <i>N. leucodon/ msy</i> (f)    | 54/86 | Hadid et al. 2012  |
| HQ652168   | isolate 6063          | <i>N. leucodon/ msy</i> (f)    | 54    | Hadid, Y. 2010     |
| HQ652174   | Lipnița, RO           | <i>N. leucodon/ sre</i> (s)    | 48/78 | Hadid et al. 2012  |
| HQ652152   | Kars Arpaçay, TR      | <i>N. xanthodon</i>            | 50    | Hadid et al. 2012  |
| HQ652184   | Karaman, TR           | <i>N. xanthodon</i>            | 60    | Hadid et al. 2012  |
| HQ652189   | Sarikamiş, TR         | <i>N. xanthodon</i>            | 50    | Hadid et al. 2012  |
| HQ652185   | Konya, TR             | <i>N. xanthodon</i>            | 62    | Hadid et al. 2012  |
| HQ652176   | Ankara, TR            | <i>N. xanthodon</i>            | 62    | Hadid et al. 2012  |
| HQ652180   | Beyşehir, TR          | <i>N. xanthodon</i>            | 40    | Hadid et al. 2012  |
| HQ652181   | Denizili, TR          | <i>N. xanthodon</i>            | 60    | Hadid et al. 2012  |
| HQ652187   | Malatya, TR           | <i>N. xantodon/ vasvarii</i>   | 60    | Hadid et al. 2012  |
| HQ652179   | Bingöl, TR            | <i>N. xantodon/ tuncelicus</i> | 54    | Hadid et al. 2012  |
| HQ652154   | Alma, IL              | <i>N. ehrenbergi/ galili</i>   | 52    | Hadid et al. 2012  |
| HQ652153   | Alma, IL              | <i>N. ehrenbergi/ galili</i>   | 52    | Hadid et al. 2012  |
| HQ652160   | KBZ, IL               | <i>N. ehrenbergi/ galili</i>   | 52    | Hadid et al. 2012  |
| HQ652161   | Alma, IL              | <i>N. ehrenbergi/ galili</i>   | 52    | Hadid et al. 2012  |
| HQ652167   | KBZ, IL               | <i>N. ehrenbergi/ galili</i>   | 52    | Hadid et al. 2012  |
| HQ652164   | Mt. Hermon, IL        | <i>N. ehrenbergi/ golani</i>   | 54    | Hadid et al. 2012  |

|          |                   |                               |    |                   |
|----------|-------------------|-------------------------------|----|-------------------|
| HQ652166 | El Al, IL         | <i>N. ehrenbergi/ golani</i>  | 54 | Hadid et al. 2012 |
| HQ652169 | Quenetra, IL      | <i>N. ehrenbergi/ golani</i>  | 54 | Hadid et al. 2012 |
| HQ652177 | Anza, IL          | <i>N. ehrenbergi/ judaei</i>  | 60 | Hadid et al. 2012 |
| HQ652186 | Lahav, IL         | <i>N. ehrenbergi/ judaei</i>  | 60 | Hadid et al. 2012 |
| JN571137 | Muhraka, IL       | <i>N. ehrenbergi/ carmeli</i> | 58 | Hadid et al. 2012 |
| NC020756 | Mt Carmel, IL     | <i>N. ehrenbergi/ carmeli</i> | 58 | Hadid et al. 2012 |
| HQ652192 | Iași, RO          | <i>S. graecus graecus</i>     | 62 | Hadid, Y. 2010    |
| HQ652193 | Kherson, UA       | <i>S. arenarius</i>           | 62 | Hadid, Y. 2010    |
| HQ652172 | Novomoszkovsz, UA | <i>S. microphthalmus</i>      | 60 | Hadid, Y. 2010    |
| KM434232 | -                 | <i>R. sinensis</i>            |    | Xu et al. 2014    |
| NC026124 | -                 | <i>R. sinensis</i>            |    | Xu et al. 2014    |

\* ISO country code

**Table S2:** A list of *MT-CYTB* sequences imported from GenBank. See Figure 1 for abbreviations of *N. leucodon* chromosomal forms and their sampling localities (letters in parentheses).

| GenBank ID | Sampling Locality* | Species/Chromosomal Form    | 2n/NF | Reference             |
|------------|--------------------|-----------------------------|-------|-----------------------|
| JX451841   | Čemerno, BA        | <i>N. leucodon/ her</i> (b) | 54/90 | Kryštufek et al. 2012 |
| JX451833   | Jahorina Mt. BA    | <i>N. leucodon/ her</i> (b) | 54/90 | Kryštufek et al. 2012 |
| MN497966   | Deliblato, RS      | <i>N. leucodon/ hun</i> (d) | 48/84 | Nemeth et al. 2020    |
| JX451843   | Grebenac, RS       | <i>N. leucodon/ hun</i> (d) | 48/84 | Kryštufek et al. 2012 |
| JX451842   | Grebenac, RS       | <i>N. leucodon/ hun</i> (d) | 48/84 | Kryštufek et al. 2012 |
| JN656385   | Hajdúbagos, HU     | <i>N. leucodon/ tra</i> (e) | 50/84 | Nemeth et al. 2013    |
| MN497974   | Debrecen, HU       | <i>N. leucodon/ tra</i> (e) | 50/84 | Nemeth et al. 2020    |
| MN497973   | Hajdúhadház, HU    | <i>N. leucodon/ tra</i> (e) | 50/84 | Nemeth et al. 2020    |
| MN497972   | Apahida, RO        | <i>N. leucodon/ tra</i> (e) | 50/84 | Nemeth et al. 2020    |
| MN497971   | Józsa, HU          | <i>N. leucodon/ tra</i> (e) | 50/84 | Nemeth et al. 2020    |

|          |                        |                             |          |                       |
|----------|------------------------|-----------------------------|----------|-----------------------|
| JN656390 | Kelebia, RS            | <i>N. leucodon/ msy</i> (f) | 54/86    | Nemeth et al. 2013    |
| JN656389 | Stražilovo, RS         | <i>N. leucodon/ msy</i> (f) | 54/86    | Nemeth et al. 2013    |
| JN656386 | Čortanovci, RS         | <i>N. leucodon/ msy</i> (f) | 54/86    | Nemeth et al. 2013    |
| JX451840 | Galičica, MK           | <i>N. leucodon/ mak</i> (h) | 52/86    | Kryštufek et al. 2012 |
| JX451839 | Galičica, MK           | <i>N. leucodon/ mak</i> (h) | 52/86    | Kryštufek et al. 2012 |
| JX451838 | Pelister Mt. MK        | <i>N. leucodon/ mak</i> (h) | 52/86    | Kryštufek et al. 2012 |
| JX451837 | Pelister Mt. MK        | <i>N. leucodon/ mak</i> (h) | 52/86    | Kryštufek et al. 2012 |
| JX451836 | Pelister Mt. MK        | <i>N. leucodon/ mak</i> (h) | 52/86    | Kryštufek et al. 2012 |
| JX451835 | Bistra Mt. MK          | <i>N. leucodon/ mak</i> (h) | 52/86    | Kryštufek et al. 2012 |
| JX451834 | Bistra Mt. MK          | <i>N. leucodon/ mak</i> (h) | 52/86    | Kryštufek et al. 2012 |
| MH300079 | Eceabat, Canakkale, TR | <i>N. leucodon/ tur</i> (r) | 56/76-78 | Matur et al. 2018     |
| FJ656300 | Kırklareli, TR         | <i>N. leucodon/ tur</i> (r) | 56/76-78 | Sözen et al. 2016     |
| MH300078 | Eceabat, Canakkale, TR | <i>N. leucodon/ tur</i> (r) | 56/76-78 | Matur et al. 2018     |
| FJ656301 | Kırklareli, TR         | <i>N. leucodon/ tur</i> (r) | 56/76-78 | Sözen et al. 2016     |
| FJ656299 | Kırklareli, TR         | <i>N. leucodon/ tur</i> (r) | 56/76-78 | Sözen et al. 2016     |
| JN656388 | Odesa, UA              | <i>N. leucodon/ leu</i> (t) | 56/84    | Nemeth et al. 2013    |
| FJ656285 | Balıkesir, TR          | <i>N. xanthodon</i>         | 2n38     | Sözen et al. 2016     |
| FJ656298 | Kastamonu, TR          | <i>N. xanthodon</i>         | 2n60     | Sözen et al. 2016     |
| FJ656297 | Karabük, TR            | <i>N. xanthodon</i>         | 2n60     | Sözen et al. 2016     |
| FJ656296 | Kütahya, TR            | <i>N. xanthodon</i>         | 2n60     | Sözen et al. 2016     |
| FJ656295 | Kütahya, TR            | <i>N. xanthodon</i>         | 2n60     | Sözen et al. 2016     |
| FJ656280 | Aydın, TR              | <i>N. xanthodon</i>         | 2n36     | Sözen et al. 2016     |
| FJ656279 | Aydın, TR              | <i>N. xanthodon</i>         | 2n36     | Sözen et al. 2016     |
| FJ656294 | Isparta, TR            | <i>N. xanthodon</i>         | 2n56     | Sözen et al. 2016     |
| FJ656292 | Isparta, TR            | <i>N. xanthodon</i>         | 2n56     | Sözen et al. 2016     |

|          |                         |                          |      |                    |
|----------|-------------------------|--------------------------|------|--------------------|
| FJ656264 | Isparta, TR             | <i>N. xanthodon</i>      | 2n40 | Sözen et al. 2016  |
| FJ656263 | Gökçeada, TR            | <i>N. xanthodon</i>      | 2n38 | Sözen et al. 2016  |
| NC020756 | Carmel Mt, IL           | <i>N. carmeli</i>        | 58   | Hadid et al. 2012  |
| JN571137 | Carmel Mt, IL           | <i>N. carmeli</i>        | 58   | Hadid et al. 2012  |
| JN571136 | Judean Mt, IL           | <i>N. judaei</i>         | 60   | Hadid et al. 2012  |
| JN571135 | Judean Mt, IL           | <i>N. judaei</i>         | 60   | Hadid et al. 2012  |
| JN571134 | Golan Heights, IL       | <i>N. golani</i>         | 54   | Hadid et al. 2012  |
| NC020757 | Golan Heights, IL       | <i>N. golani</i>         | 54   | Hadid et al. 2012  |
| JN571130 | Galilee Mt, IL          | <i>N. galili</i>         | 52   | Hadid et al. 2012  |
| JN571129 | Galilee Mt, IL          | <i>N. galili</i>         | 52   | Hadid et al. 2012  |
| KF021261 | Krivij Rig, UA          | <i>S. zemni</i>          | 62   | Nemeth et al. 2013 |
| KF021259 | Novomoszkovsz, UA       | <i>S. microphthalmus</i> | 60   | Nemeth et al. 2013 |
| KF021258 | Novomoszkovsz, UA       | <i>S. microphthalmus</i> | 60   | Nemeth et al. 2013 |
| KF021262 | Kherson, UA             | <i>S. arenarius</i>      | 62   | Nemeth et al. 2013 |
| KF021257 | Sândulești, RO          | <i>S. antiquus</i>       | 62   | Nemeth et al. 2013 |
| KF021256 | Aiton, RO               | <i>S. antiquus</i>       | 62   | Nemeth et al. 2013 |
| KF021253 | Dealul lui Dumnezeu, RO | <i>S. graecus</i>        | 62   | Nemeth et al. 2013 |
| KF021252 | David Valley, RO        | <i>S. graecus</i>        | 62   | Nemeth et al. 2013 |
| M434232  | /                       | <i>R. sinensis</i>       | /    | Xu et al. 2014     |
| C026124  | /                       | <i>R. sinensis</i>       | /    | Xu et al. 2014     |

---

\* ISO country code

**Table S3:** Primer sequences applied in the analysis.

| Primer Name | Primer Sequence (5'–3') | Reference |
|-------------|-------------------------|-----------|
|-------------|-------------------------|-----------|

---

|            |                        |                    |
|------------|------------------------|--------------------|
| 1CB-IF     | ATATTTACATGCCAACGGAG   | Newly designed     |
| 1CB-IR     | ATCATTGAGGTTTGATGTGT   | Newly designed     |
| 1CB-F      | TCAACATGATGAAACTTCGG   | Modified from [48] |
| 1CB-R      | ACTGGCTGCCCCGCCGATTCA  | Modified from [48] |
| CYB1-F     | TGACATGAAAAATCATCGTTG  | Modified from [48] |
| CYB2-R     | TCAAAATGATATTTGTCCTCA  | Newly designed     |
| CYB1-NF    | GTAAATCACACCCCCTAATCA  | Modified from [49] |
| CYB2-NR    | GAACATATCCTATAAATGCG   | Modified from [49] |
| CYB 2-F    | AGCATCTCAACATGATGAAA   | Modified from [49] |
| CYB 1-R    | CATTTCTGGTTTACAAGAC    | Modified from [49] |
| 16 Sar     | CGCCTGTTTATCAAAAACAT   | Universal          |
| 16 SBR OiR | CCGGTCTGAACTCAGATCACGT | Universal          |
| 16S-A In-F | TGACTGTGCAAAGGTAGC     | Universal          |

---

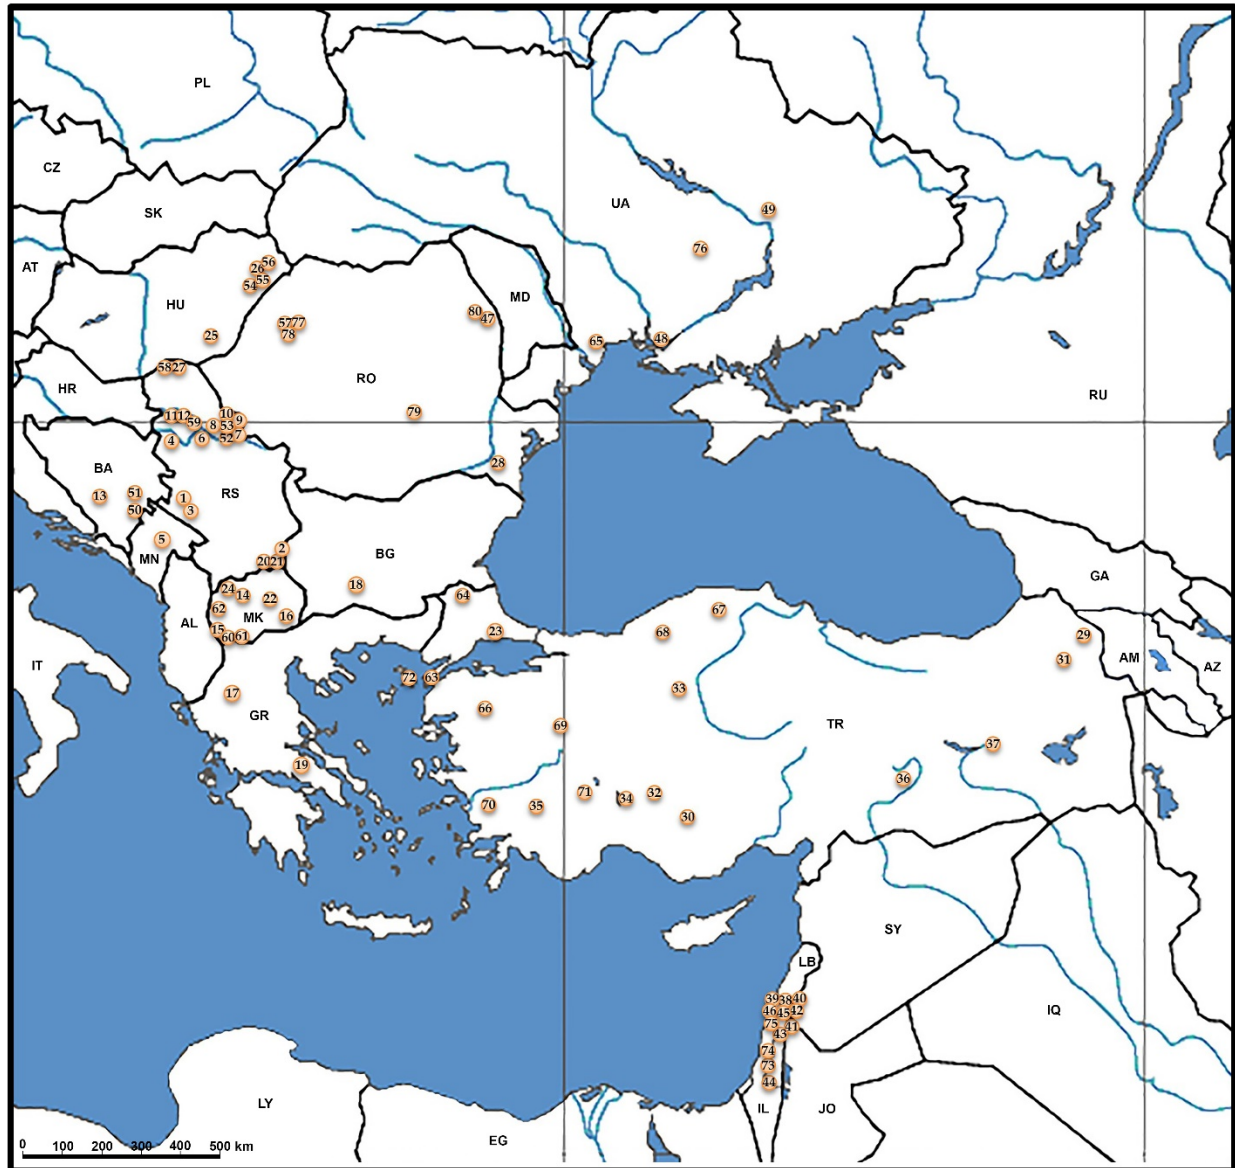

Figure S1. Geographic distribution of sampling localities of all specimens (sequences) analysed in this study.
